# Supplementary material
Source: Springer Nature journal article supplement (https://www.springermedizin.de/resource/supplementary/12879_2007_749_MOESM2_ESM.pdf/9449314)

**prevalence**

100  
75  
50  
25  
0

6-11

12-13

13-18

**age group**

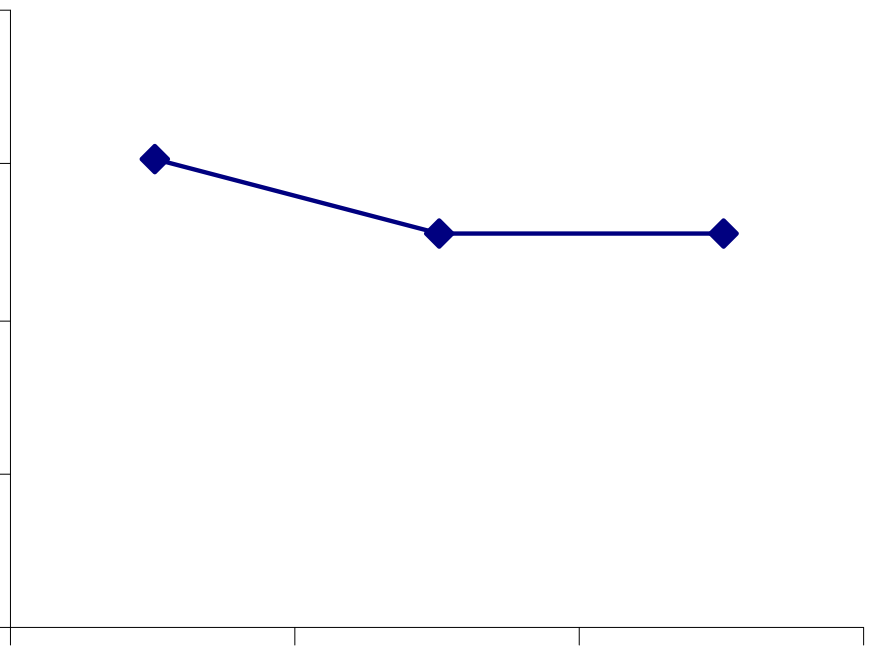

Supplement: MOESM2 [file 9449314]
